# Supplementary material for: The In Vitro Stability of Circulating Tumour DNA
Source: PubMed Central journal article supplement (PMC5154581; doi:10.1371/journal.pone.0168153), 2016-12-13

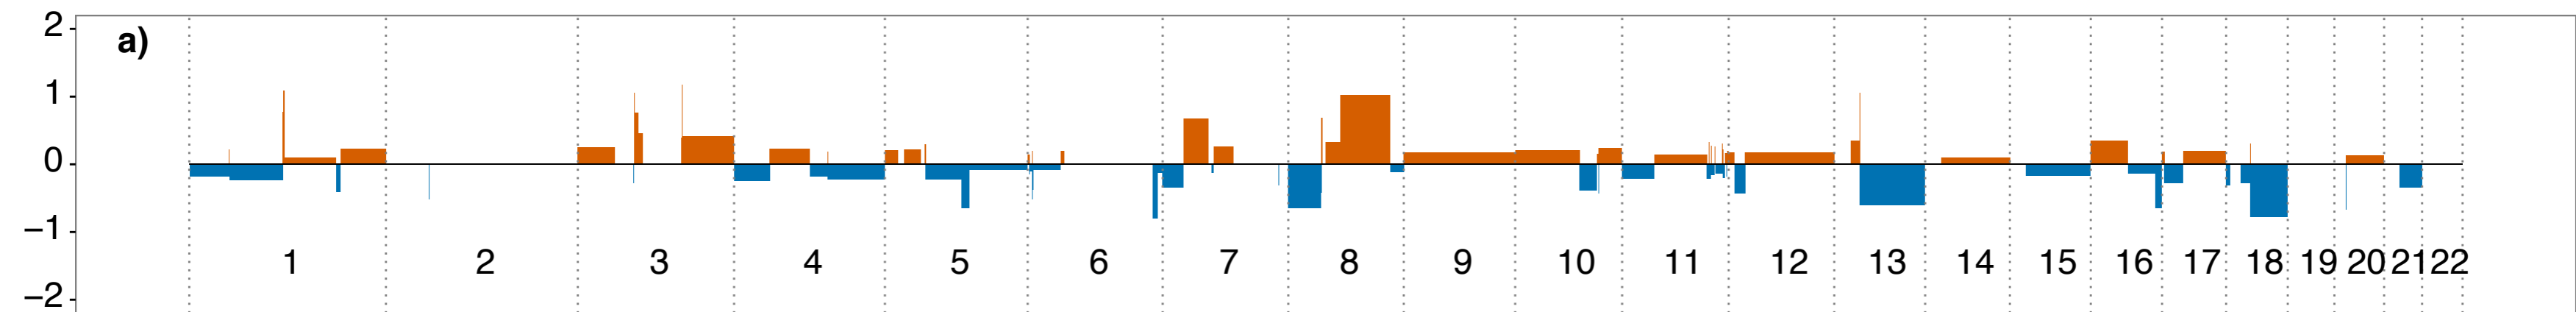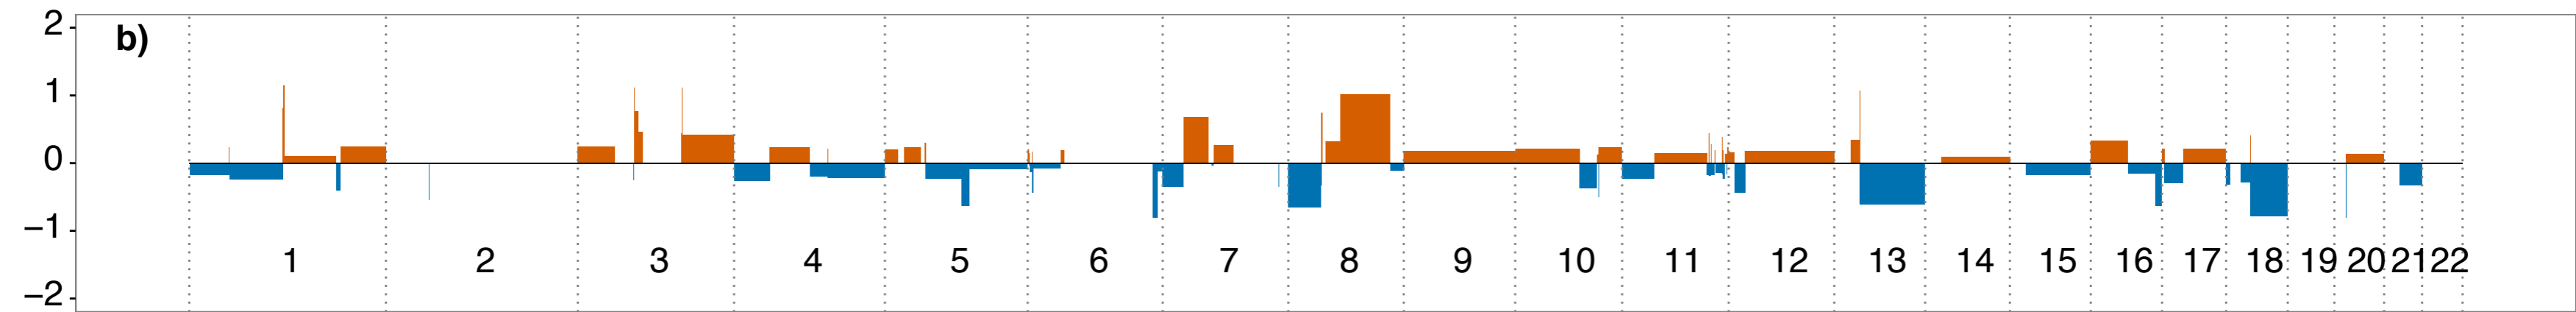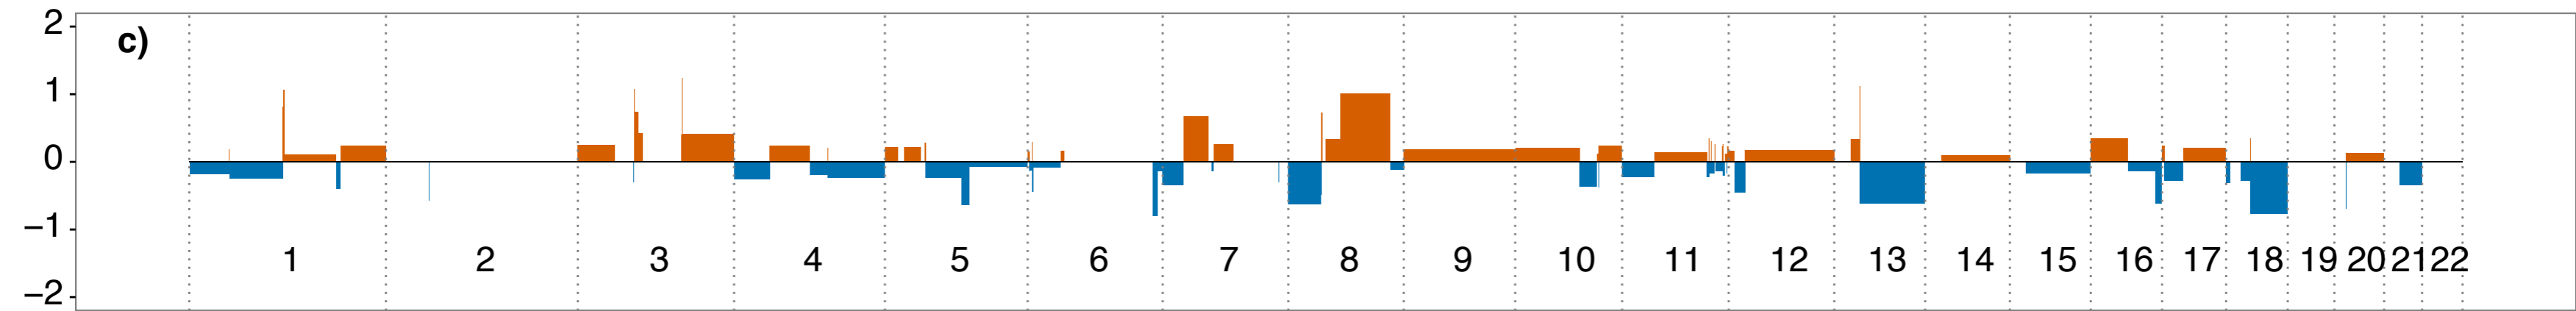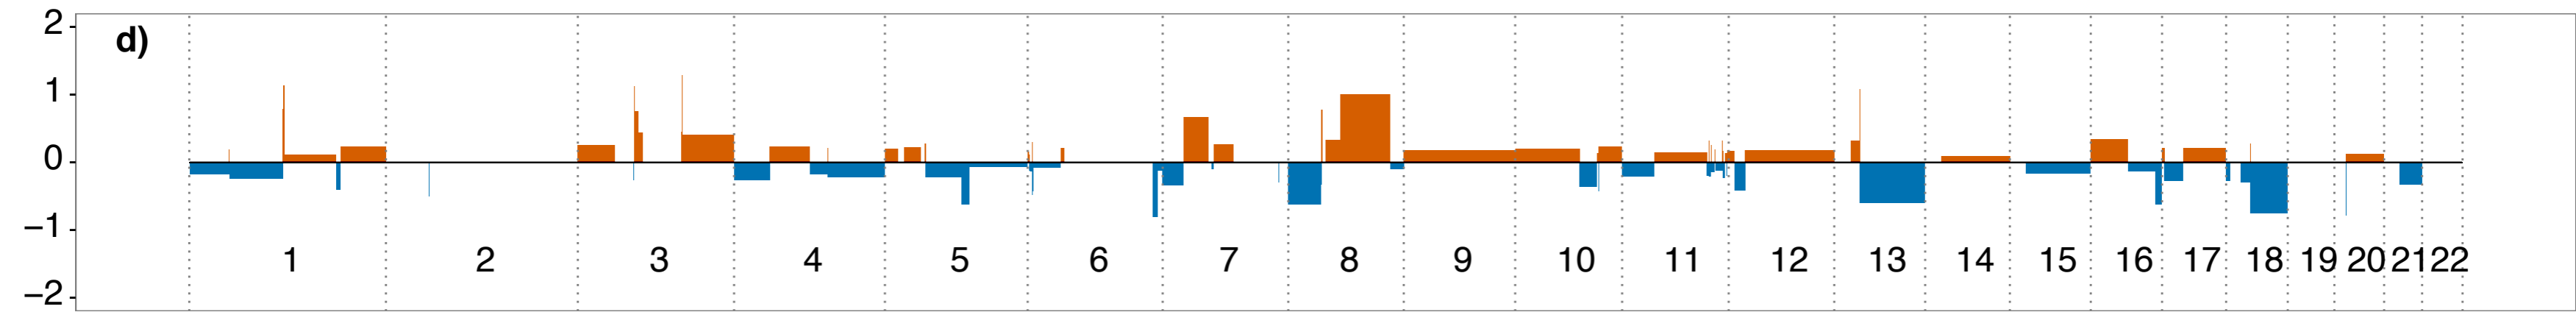

Supplement: pone.0168153.s015.pdf [file pone.0168153.s015.pdf]
