# Supplementary material for: The In Vitro Stability of Circulating Tumour DNA
Source: PLoS One. 2016 Dec 13;11(12):e0168153. doi: 10.1371/journal.pone.0168153 (PMC5154581; doi:10.1371/journal.pone.0168153)
Supplement: S1 Table — Provides an overview of the sequencing data generated; the time points for harvesting plasma; storage temperature and which tubes used. Columns in order; ID–the ID used for each patient; TOTAL_MAPPED_READS–the number of mapped reads obtained for each sequencing library; TYPE–the purpose of each sequencing library; DNA_SOURCE–the DNA source of each sequencing library; TIMEPOINT–for the in vitro time series, the time point of harvesting plasma; STORAGE–for the in vitro time series, if room temperature or cold storage was applied; TUBE–blood collection tube type. (XLSX) [file pone.0168153.s001.xlsx]

## Sheet: Sheet1
ID	TOTAL_MAPPED_READS	TYPE	DNA_SOURCE	TIMEPOINT	STORAGE	TUBE
ONK1	5388997	IN_VITRO_TIME_SERIES	PLASMA	0h	5°C	EDTA
ONK1	5939468	IN_VITRO_TIME_SERIES	PLASMA	0h	RT	EDTA
ONK1	5551365	IN_VITRO_TIME_SERIES	PLASMA	0h	RT	STRECK
ONK1	4833736	IN_VITRO_TIME_SERIES	PLASMA	24h	5°C	EDTA
ONK1	5708969	IN_VITRO_TIME_SERIES	PLASMA	24h	RT	EDTA
ONK1	5827734	IN_VITRO_TIME_SERIES	PLASMA	24h	RT	STRECK
ONK1	5686622	IN_VITRO_TIME_SERIES	PLASMA	2h	5°C	EDTA
ONK1	5819256	IN_VITRO_TIME_SERIES	PLASMA	2h	RT	EDTA
ONK1	5188685	IN_VITRO_TIME_SERIES	PLASMA	2h	RT	STRECK
ONK1	4677811	IN_VITRO_TIME_SERIES	PLASMA	4.5h	RT	EDTA
ONK1	5117429	IN_VITRO_TIME_SERIES	PLASMA	4.5h	RT	STRECK
ONK1	5680064	IN_VITRO_TIME_SERIES	PLASMA	4h	5°C	EDTA
ONK13	6191754	IN_VITRO_TIME_SERIES	PLASMA	0h	RT	EDTA
ONK13	8792205	IN_VITRO_TIME_SERIES	PLASMA	48h	RT	EDTA
ONK14	6065806	IN_VITRO_TIME_SERIES	PLASMA	0h	RT	EDTA
ONK14	8421314	IN_VITRO_TIME_SERIES	PLASMA	48h	RT	EDTA
ONK15	12941416	IN_VITRO_TIME_SERIES	PLASMA	0h	5°C	EDTA
ONK15	11875295	IN_VITRO_TIME_SERIES	PLASMA	48h	5°C	EDTA
ONK2	3855253	IN_VITRO_TIME_SERIES	PLASMA	0h	5°C	EDTA
ONK2	4729078	IN_VITRO_TIME_SERIES	PLASMA	0h	RT	EDTA
ONK2	3633489	IN_VITRO_TIME_SERIES	PLASMA	0h	RT	STRECK
ONK2	4091462	IN_VITRO_TIME_SERIES	PLASMA	24h	5°C	EDTA
ONK2	4942495	IN_VITRO_TIME_SERIES	PLASMA	24h	RT	EDTA
ONK2	3734528	IN_VITRO_TIME_SERIES	PLASMA	24h	RT	STRECK
ONK2	2846142	IN_VITRO_TIME_SERIES	PLASMA	2h	5°C	EDTA
ONK2	3900918	IN_VITRO_TIME_SERIES	PLASMA	2h	RT	EDTA
ONK2	3660105	IN_VITRO_TIME_SERIES	PLASMA	2h	RT	STRECK
ONK2	3564284	IN_VITRO_TIME_SERIES	PLASMA	3.2h	RT	EDTA
ONK2	5238832	IN_VITRO_TIME_SERIES	PLASMA	3.2h	RT	STRECK
ONK2	4061990	IN_VITRO_TIME_SERIES	PLASMA	3.8h	5°C	EDTA
ONK3	8298127	IN_VITRO_TIME_SERIES	PLASMA	0h	RT	STRECK
ONK3	14025875	IN_VITRO_TIME_SERIES	PLASMA	24h	RT	STRECK
ONK3	10602533	IN_VITRO_TIME_SERIES	PLASMA	2h	RT	STRECK
ONK3	11551776	IN_VITRO_TIME_SERIES	PLASMA	4h	RT	STRECK
ONK3	3400364	REGULAR	WBC	NA	NA	EDTA
ONK5	7568082	IN_VITRO_TIME_SERIES	PLASMA	0h	5°C	EDTA
ONK5	5541131	IN_VITRO_TIME_SERIES	PLASMA	0h	RT	EDTA
ONK5	5740969	IN_VITRO_TIME_SERIES	PLASMA	0h	RT	STRECK
ONK5	3358558	IN_VITRO_TIME_SERIES	PLASMA	24h	5°C	EDTA
ONK5	3899337	IN_VITRO_TIME_SERIES	PLASMA	24h	RT	EDTA
ONK5	3757138	IN_VITRO_TIME_SERIES	PLASMA	24h	RT	STRECK
ONK5	4523973	IN_VITRO_TIME_SERIES	PLASMA	2h	5°C	EDTA
ONK5	4949410	IN_VITRO_TIME_SERIES	PLASMA	2h	RT	EDTA
ONK5	4847725	IN_VITRO_TIME_SERIES	PLASMA	2h	RT	STRECK
ONK5	4489542	IN_VITRO_TIME_SERIES	PLASMA	4h	5°C	EDTA
ONK5	3578937	IN_VITRO_TIME_SERIES	PLASMA	4h	RT	EDTA
ONK5	4160232	IN_VITRO_TIME_SERIES	PLASMA	4h	RT	STRECK
ONK6	8451579	IN_VITRO_TIME_SERIES	PLASMA	0h	5°C	EDTA
ONK6	7881202	IN_VITRO_TIME_SERIES	PLASMA	0h	RT	EDTA
ONK6	10752361	IN_VITRO_TIME_SERIES	PLASMA	0h	RT	STRECK
ONK6	11393318	IN_VITRO_TIME_SERIES	PLASMA	24h	5°C	EDTA
ONK6	20223539	IN_VITRO_TIME_SERIES	PLASMA	24h	RT	EDTA
ONK6	16517076	IN_VITRO_TIME_SERIES	PLASMA	24h	RT	STRECK
ONK6	10229335	IN_VITRO_TIME_SERIES	PLASMA	2h	5°C	EDTA
ONK6	11813461	IN_VITRO_TIME_SERIES	PLASMA	2h	RT	EDTA
ONK6	11992898	IN_VITRO_TIME_SERIES	PLASMA	2h	RT	STRECK
ONK6	18005675	IN_VITRO_TIME_SERIES	PLASMA	4h	5°C	EDTA
ONK6	8290061	IN_VITRO_TIME_SERIES	PLASMA	4h	RT	EDTA
ONK6	8593612	IN_VITRO_TIME_SERIES	PLASMA	4h	RT	STRECK
ONK6	4886617	REGULAR	WBC	NA	NA	EDTA
ONK8	7454100	IN_VITRO_TIME_SERIES	PLASMA	0h	5°C	EDTA
ONK8	11327128	IN_VITRO_TIME_SERIES	PLASMA	0h	RT	EDTA
ONK8	16331910	IN_VITRO_TIME_SERIES	PLASMA	24h	5°C	EDTA
ONK8	12465534	IN_VITRO_TIME_SERIES	PLASMA	24h	RT	EDTA
ONK8	9727695	IN_VITRO_TIME_SERIES	PLASMA	2h	5°C	EDTA
ONK8	8053605	IN_VITRO_TIME_SERIES	PLASMA	2h	RT	EDTA
ONK8	11104244	IN_VITRO_TIME_SERIES	PLASMA	6h	5°C	EDTA
ONK8	11994935	IN_VITRO_TIME_SERIES	PLASMA	6h	RT	EDTA
ONK8	2781802	REGULAR	WBC	NA	NA	EDTA
